# Supplementary material for: Pumpkin (Cucurbita ficifolia Bouché) extract attenuate the adipogenesis in human mesenchymal stem cells by controlling adipogenic gene expression
Source: PubMed Central journal article supplement — Saudi J Biol Sci. 2018 Oct 2;26(4):744–51. doi: 10.1016/j.sjbs.2018.10.002 (PMC6486525; doi:10.1016/j.sjbs.2018.10.002), 2018-10-02
Supplement: mmc1.pdf [file mmc1.pdf]

## S1 Table

TaqMan Low Density Arrays Array Card 16

Catalog #:4346798

Design ID : PTAG0EJ

Study Name : TLDA\_ADIPO\_PANEL

Format: FORMAT\_16

Availability: Made to Order

TLDA\_ADIPO\_PANEL

#Lifetech Array Export#

TaqMan Array Micro Fluidic Cards:16

| Assay1       | Availability | Gene Symbol(s) | Gene Name(s)                                                                                       | Gene Alias(es)                                | RefSeq(s)                  | GenBank mRNA(s)                                                                                               | Species | Amplicon Length |
|--------------|--------------|----------------|----------------------------------------------------------------------------------------------------|-----------------------------------------------|----------------------------|---------------------------------------------------------------------------------------------------------------|---------|-----------------|
| H00005917_m1 | INV          | ADIPOQ         | hCG1784052 Celera Annotation;adiponectin, C1Q and collagen domain containing                       | ACDC;ACRP30;ADIPQTL1;ADPN;APM-1;APM1;GBP28    | NM_004797.3;NM_001177800.1 | AX767959.1;BC054496.1;BC096311.3;BC096309.3;BC096310.3;BC096308.3;D45371.1;EU420013.1;AK291525.1;AK312868.1   | Human   | 71              |
| H01086177_m1 | INV          | FABP4          | hCG21301 Celera Annotation;fatty acid binding protein 4, adipocyte                                 | A-FABP;AFABP;ALBP;AP2                         | NM_001442.2                | CD000452.1;BT006809.1;BC003672.1;J02874.1;CR456903.1;BQ880795.1                                               | Human   | 96              |
| H01016719_m1 | INV          | PPARGC1A       | hCG1811770 Celera Annotation;peroxisome proliferator-activated receptor gamma, coactivator 1 alpha | LEM6;PGC-1(alpha);PGC-1v;PGC1;PGC1A;PPARGC1   | NM_013261.3                | AF106698.1;AB061325.1;JQ772120.1;AF159714.1;AF186379.1;JQ772117.1;JQ772118.1;JQ772119.1;HQ695733.1;JQ772116.1 | Human   | 74              |
| H99999905_m1 | -            | GADPH          | -                                                                                                  | -                                             | -                          | -                                                                                                             | Human   | 0               |
| H00153715_m1 | INV          | ACACB          | hCG2015310 Celera Annotation;acetyl-CoA carboxylase beta                                           | ACC2;ACCB;HACC275                             | NM_001093.3                | AY382667.1;U89344.1;AJ575431.2;AJ575592.3;DQ493870.1                                                          | Human   | 88              |
| H00270923_s1 | INV          | CEBPB          | CCAAT/enhancer binding protein (C/EBP), beta;hCG37893 Celera Annotation                            | C/EBP-beta;CRP2;IL6DBP;LAP;NF-IL6;PP9092;TCF5 | NM_005194.3                | BC021931.1;AF289608.1;AK291536.1;BC007538.1                                                                   | Human   | 75              |
| H00269972_s1 | INV          | CEBPA          | CCAAT/enhancer binding protein (C/EBP), alpha;hCG20142 Celera Annotation                           | C/EBP-alpha;CEBP                              | NM_004364.3                | BC063874.1;Y11525.1                                                                                           | Human   | 77              |
| H00173425_m1 | INV          | LPL            | lipoprotein lipase;hCG22262 Celera Annotation                                                      | HDLCQ11;LPD                                   | NM_000237.2                | AK092286.1;AK222464.1;AK312311.1;BT006726.1;X54516.1;BC011353.1;CR457054.1;M15856.1;X14390.1;AK290290.1       | Human   | 103             |
| H00605917_m1 | INV          | ADIPOQ         | hCG1784052 Celera Annotation;adiponectin, C1Q and collagen domain containing                       | ACDC;ACRP30;ADIPQTL1;ADPN;APM-1;APM1;GBP28    | NM_004797.3;NM_001177800.1 | AX767959.1;BC054496.1;BC096311.3;BC096309.3;BC096310.3;BC096308.3;D45371.1;EU420013.1;AK291525.1;AK312868.1   | Human   | 71              |
| H01086177_m1 | INV          | FABP4          | hCG21301 Celera Annotation;fatty acid binding protein 4, adipocyte                                 | A-FABP;AFABP;ALBP;AP2                         | NM_001442.2                | CD000452.1;BT006809.1;BC003672.1;J02874.1;CR456903.1;BQ880795.1                                               | Human   | 96              |
| H01016719_m1 | INV          | PPARGC1A       | hCG1811770 Celera Annotation;peroxisome proliferator-activated receptor gamma, coactivator 1 alpha | LEM6;PGC-1(alpha);PGC-1v;PGC1;PGC1A;PPARGC1   | NM_013261.3                | AF106698.1;AB061325.1;JQ772120.1;AF159714.1;AF186379.1;JQ772117.1;JQ772118.1;JQ772119.1;HQ695733.1;JQ772116.1 | Human   | 74              |
| H03003631_g1 | INV          | 18S            | Eukaryotic 18S rRNA                                                                                | -                                             | -                          | 18S_consensus.0                                                                                               | Human   | 69              |
| H00153715_m1 | INV          | ACACB          | hCG2015310 Celera Annotation;acetyl-CoA carboxylase beta                                           | ACC2;ACCB;HACC275                             | NM_001093.3                | AY382667.1;U89344.1;AJ575431.2;AJ575592.3;DQ493870.1                                                          | Human   | 88              |
| H00270923_s1 | INV          | CEBPB          | CCAAT/enhancer binding protein (C/EBP), beta;hCG37893 Celera Annotation                            | C/EBP-beta;CRP2;IL6DBP;LAP;NF-IL6;PP9092;TCF5 | NM_005194.3                | BC021931.1;AF289608.1;AK291536.1;BC007538.1                                                                   | Human   | 75              |
| H00269972_s1 | INV          | CEBPA          | CCAAT/enhancer binding protein (C/EBP), alpha;hCG20142 Celera Annotation                           | C/EBP-alpha;CEBP                              | NM_004364.3                | BC063874.1;Y11525.1                                                                                           | Human   | 77              |
| H00173425_m1 | INV          | LPL            | lipoprotein lipase;hCG22262 Celera Annotation                                                      | HDLCQ11;LPD                                   | NM_000237.2                | AK092286.1;AK222464.1;AK312311.1;BT006726.1;X54516.1;BC011353.1;CR457054.1;M15856.1;X14390.1;AK290290.1       | Human   | 103             |
